# Supplementary material for: Effect of appropriate dose, spectrum, and timing of antibiotics on 28-day mortality in patients with sepsis in the emergency department
Source: PubMed Central journal article supplement (PMC8943924; doi:10.1186/s12245-022-00416-6), 2022-03-24
Supplement: 12245_2022_416_MOESM1_ESM.pdf [file 12245_2022_416_MOESM1_ESM.pdf]

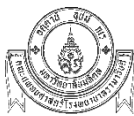

# Ramathibodi Sepsis Protocol

Version 2020\_10

| Hour-1 Sepsis / Progress                                                  |               |                  |                                  |                                                         |                                          |      | Date/Time                             | Hour-1 Sepsis / Order                                                                                          |                                                    |
|---------------------------------------------------------------------------|---------------|------------------|----------------------------------|---------------------------------------------------------|------------------------------------------|------|---------------------------------------|----------------------------------------------------------------------------------------------------------------|----------------------------------------------------|
| <b>Time zero = ED Triage =</b>                                            |               |                  |                                  |                                                         |                                          |      |                                       | <input type="checkbox"/> CBC, E'Lyte, BUN/Cr                                                                   | <input type="checkbox"/> POC-glu                   |
| <b>Adult REWs <math>\geq 4</math> and suspected infection</b>             |               |                  |                                  |                                                         |                                          |      |                                       | <input type="checkbox"/> H/C x II                                                                              | <input type="radio"/> LFT, Ca, Mg, PO <sub>4</sub> |
| Adult REWs                                                                | RR            | SpO <sub>2</sub> | Temp                             | SBP                                                     | HR                                       | AVPU |                                       | <input type="checkbox"/> Serum lactate ( <input type="checkbox"/> arterial / <input type="checkbox"/> venous)  |                                                    |
| 3                                                                         | $\leq 10$     | $\leq 84$        | $\leq 33.9$                      | $\leq 89$                                               | $\leq 39$                                | U    |                                       | <input type="checkbox"/> Coag                                                                                  | <input type="radio"/> Fibrinogen                   |
| 2                                                                         |               | 85-89            | 34-34.9                          |                                                         |                                          | P    |                                       |                                                                                                                |                                                    |
| 1                                                                         |               | 90-92            | 35-35.9                          | 90-99                                                   | 40-49                                    | V    |                                       |                                                                                                                |                                                    |
| 0                                                                         | 11-20         | $\geq 93$        | 36-37.9                          | 100-199                                                 | 50-99                                    | A    |                                       | <input type="radio"/> ABG ( <input type="radio"/> Room air <input type="radio"/> O <sub>2</sub> _____ )        |                                                    |
| 1                                                                         | 21-30         |                  | 38-38.9                          |                                                         | 100-109                                  |      |                                       |                                                                                                                |                                                    |
| 2                                                                         | 31-35         |                  | $\geq 39$                        | $\geq 200$                                              | 110-129                                  |      |                                       | <input type="checkbox"/> EKG                                                                                   | <input type="checkbox"/> CXR                       |
| 3                                                                         | $\geq 36$     |                  |                                  |                                                         | $\geq 130$                               |      |                                       |                                                                                                                |                                                    |
| <b>Source:</b>                                                            |               |                  |                                  |                                                         |                                          |      |                                       | <input type="checkbox"/> U/A, U/C                                                                              | <input type="radio"/> Sputum G/S, C/S              |
|                                                                           |               |                  |                                  |                                                         |                                          |      |                                       | <input type="checkbox"/> Antibiotic STAT (within 1 h)                                                          |                                                    |
|                                                                           |               |                  |                                  |                                                         |                                          |      |                                       | <input type="checkbox"/> IV fluid (if MAP <65, lactate $\geq 4$ : initial 30ml/kg)                             |                                                    |
|                                                                           |               |                  |                                  |                                                         |                                          |      |                                       |                                                                                                                |                                                    |
|                                                                           |               |                  |                                  |                                                         |                                          |      |                                       |                                                                                                                |                                                    |
|                                                                           |               |                  |                                  |                                                         |                                          |      |                                       |                                                                                                                |                                                    |
|                                                                           |               |                  |                                  |                                                         |                                          |      |                                       |                                                                                                                |                                                    |
|                                                                           |               |                  |                                  |                                                         |                                          |      |                                       |                                                                                                                |                                                    |
|                                                                           |               |                  |                                  |                                                         |                                          |      |                                       |                                                                                                                |                                                    |
|                                                                           |               |                  |                                  |                                                         |                                          |      |                                       |                                                                                                                |                                                    |
|                                                                           |               |                  |                                  |                                                         |                                          |      |                                       |                                                                                                                |                                                    |
|                                                                           |               |                  |                                  |                                                         |                                          |      |                                       |                                                                                                                |                                                    |
|                                                                           |               |                  |                                  |                                                         |                                          |      |                                       |                                                                                                                |                                                    |
| <b>Initial Lactate V.....A.....</b>                                       |               |                  |                                  |                                                         |                                          |      |                                       |                                                                                                                |                                                    |
| <b>SOFA</b>                                                               |               |                  |                                  |                                                         |                                          |      |                                       | <input type="checkbox"/> Serial lactate ( <input type="checkbox"/> arterial / <input type="checkbox"/> venous) |                                                    |
|                                                                           | 0             | 1                | 2                                | 3                                                       | 4                                        |      | at time _____ (if initial lactate >2) |                                                                                                                |                                                    |
| PaO <sub>2</sub> /FIO <sub>2</sub> (mmHg)                                 | $\geq 400$    | <400             | <300                             | <200<br>with resp.support                               | <100<br>with resp.support                |      |                                       |                                                                                                                |                                                    |
| Platelets (x10 <sup>3</sup> )                                             | $\geq 150$    | <150             | <100                             | <50                                                     | <20                                      |      |                                       |                                                                                                                |                                                    |
| T.bilirubin (mg/dL)                                                       | <1.2          | 1.2-1.9          | 2.0-5.9                          | 6.0-11.9                                                | >12                                      |      |                                       |                                                                                                                |                                                    |
| Cardiovas.<br>(mcg/kg/min<br>at least 1 hr)                               | MAP $\geq$ 70 | MAP<70           | DoPa <5<br>or DoBu<br>(any dose) | DoPa 5.1-15<br>or EpiN $\leq$ 0.1<br>or NorE $\leq$ 0.1 | DoPa >15<br>or EpiN >0.1<br>or NorE >0.1 |      |                                       |                                                                                                                |                                                    |
| GCS                                                                       | 15            | 13-14            | 10-12                            | 6-9                                                     | <6                                       |      |                                       |                                                                                                                |                                                    |
| Creatinine (mg/dL)                                                        | <1.2          | 1.2-1.9          | 2.0-3.4                          | 3.5-4.9                                                 | >5                                       |      |                                       |                                                                                                                |                                                    |
| Urine (ml/day)                                                            |               |                  |                                  | <500                                                    | <200                                     |      |                                       |                                                                                                                |                                                    |
| <b>SOFA</b> / baseline (Time .....)                                       |               |                  |                                  |                                                         |                                          |      |                                       | <input type="checkbox"/> POCUS                                                                                 |                                                    |
| acute change of SOFA score from infection                                 |               |                  |                                  |                                                         |                                          |      |                                       |                                                                                                                |                                                    |
| <input type="checkbox"/> 0-1 : possible discharge if clinically indicated |               |                  |                                  |                                                         |                                          |      |                                       |                                                                                                                |                                                    |
| <input type="checkbox"/> $\geq 2$ : Diagnosis of sepsis                   |               |                  |                                  |                                                         |                                          |      |                                       |                                                                                                                |                                                    |
