# Supplementary material for: Effect of appropriate dose, spectrum, and timing of antibiotics on 28-day mortality in patients with sepsis in the emergency department
Source: PubMed Central journal article supplement (PMC8943924; doi:10.1186/s12245-022-00416-6), 2022-03-24
Supplement: 12245_2022_416_MOESM2_ESM.pdf [file 12245_2022_416_MOESM2_ESM.pdf]

**Supplementary 2 Sepsis screening tool**

**1. quick Sequential organ failure assessment (qSOFA) score  $\geq 2$**

- Hypotension, Systolic BP  $\leq 100$  mmHg
- Alteration of consciousness
- Tachypnea  $\geq 22$  breath/minute

**2. SOFA Score: Sequential organ failure assessment score  $\geq 2$**

|                                                | 0                  | 1               | 2                                     | 3                                                                   | 4                                                                |
|------------------------------------------------|--------------------|-----------------|---------------------------------------|---------------------------------------------------------------------|------------------------------------------------------------------|
| PaO <sub>2</sub> /Fio <sub>2</sub> Ratio, mmHg | $\geq 400$         | $< 400$         | $< 300$                               | $< 200$                                                             | $< 100$                                                          |
| Platelets, $\times 10^3$                       | $\geq 150$         | $< 150$         | $< 100$                               | $< 50$                                                              | $< 20$                                                           |
| Bilirubin, mg/dl                               | $< 1.2$            | 1.2-1.9         | 2.0-5.9                               | 6.0-11.9                                                            | $> 12.0$                                                         |
| Cardiovascular (catecholamine Ug/kg/min)       | MAP $\geq 70$ mmHg | MAP $< 70$ mmHg | Dopamine $< 5$ or Dobutamine any dose | Dopamine 5.1-15 or epinephrine $\leq 0.1$ or norepinephrine $< 0.1$ | Dopamine $> 15$ or epinephrine $> 0.1$ or norepinephrine $> 0.1$ |
| Glasgow Coma Scale                             | 15                 | 13-14           | 10-12                                 | 6-9                                                                 | $< 6$                                                            |
| Creatinine, mg/dl                              | $< 1.2$            | 1.2-1.9         | 1.9-3.4                               | 3.4-5.0                                                             | $> 5.0$                                                          |
| Urine output, ml/day                           |                    |                 |                                       | $< 500$                                                             | $< 200$                                                          |

**3. Ramathibodi early warning score (REWs) clinical parameters and rubric scale for each parameter.**

| <b>REWS</b> |       |       |             |         |         |                   |
|-------------|-------|-------|-------------|---------|---------|-------------------|
| Score       | RR    | SpO2  | Temperature | SBP     | HR      | Mental status     |
| 3           | ≤10   | ≤84   | ≤33.9       | ≤89     | ≤39     |                   |
| 2           |       | 85-89 | 34-34.9     |         |         |                   |
| 1           |       | 90-92 | 35-35.9     | 90-99   | 40-49   |                   |
| 0           | 11-20 | ≥93   | 36-37.9     | 100-199 | 50-99   | Alert             |
| 1           | 21-30 |       | 38-38.9     |         | 100-109 | Response to voice |
| 2           | 31-35 |       | ≥39.0       | ≥200    | 110-129 | Response to pain  |
| 3           | ≥36   |       |             |         | ≥130    | Unresponsive      |
